# Supplementary material for: Comparative Study on Gluten Protein Composition of Ancient (Einkorn, Emmer and Spelt) and Modern Wheat Species (Durum and Common Wheat)
Source: PubMed Central journal article supplement (PMC6769531; doi:10.3390/foods8090409), 2019-09-12
Supplement: foods-08-00409-s001.pdf [file foods-08-00409-s001.pdf]

Supplementary Materials

**Comparative Study on Gluten Protein Composition of Ancient  
(Einkorn, Emmer and Spelt) and Modern Wheat Species (Durum and  
Common Wheat)**

Sabrina Geisslitz <sup>1</sup>, C. Friedrich H. Longin <sup>2</sup>, Katharina A. Scherf <sup>1,3\*</sup>, Peter Koehler <sup>4</sup>

<sup>1</sup> Leibniz-Institute for Food Systems Biology at the Technical University of Munich, Lise-Meitner-Strasse 34, 85354 Freising, Germany

<sup>2</sup> State Plant Breeding Institute, University of Hohenheim, 70599 Stuttgart, Germany

<sup>3</sup> Department of Bioactive and Functional Food Chemistry, Institute of Applied Biosciences, Karlsruhe Institute of Technology (KIT), Adenauerring 20 a, 76131 Karlsruhe, Germany

<sup>4</sup> biotask AG, Schelztorstrasse 54-56, 73728 Esslingen am Neckar, Germany

**Table S1**

Overview of all 75 samples of common wheat, spelt, durum wheat, emmer and einkorn and their abbreviations

| <b>Common wheat</b> | <b>Spelt</b> | <b>Durum wheat</b> | <b>Emmer</b> | <b>Einkorn</b> |     |                  |     |             |     |
|---------------------|--------------|--------------------|--------------|----------------|-----|------------------|-----|-------------|-----|
| Altigo              | ALT          | Badengold          | BAG          | Auradur        | AUR | 9.105/06/01*     | EM1 | 8.103/04*   | K01 |
| Colonia             | COL          | Badenkron          | BAK          | Elsadur        | ELS | 9.118/05/01*     | EM2 | 8.108/04**  | K02 |
| Cubus               | CUB          | Badenstern         | BAS          | Karur          | KAR | 9.199/06/01*     | EM3 | 8.116/04*   | K03 |
| Event               | EVE          | D-04004/03*        | DI1          | Logidur        | LOG | CC1E-04058/01*   | EM4 | M-03021/03* | K04 |
| Genius              | GEN          | D-04004/04*        | DI2          | Lunadur        | LUN | CC1E-04059/01*   | EM5 | M-04003/01* | K05 |
| JB Asano            | JBA          | D-04004/08*        | DI3          | Lupidur *      | LUP | CC1E04059/02*    | EM6 | M-04018/01* | K06 |
| Julius              | JUL          | D-04004/09*        | DI4          | W-05005/02*    | DU1 | CC1E04059/03*    | EM7 | M-04018/02* | K07 |
| Lear                | LEA          | D-05015/03*        | DI5          | W-05006/01*    | DU2 | CC1E-04059/04*   | EM8 | M-04018/03* | K08 |
| Meister             | MEI          | Divimar            | DIV          | W-05018/04*    | DU3 | E-07086/01*      | EM9 | M-04033/01* | K09 |
| Mulan               | MUL          | Filderstolz        | FIL          | W-05020/01*    | DU4 | Heuholzer Kolben | HEU | M-04033/03* | K10 |
| Orcas               | ORC          | Franckenkorn       | FRA          | W-05024/01*    | DU5 | Osiris           | OSI | M-07006/01* | K11 |
| Skalmeje            | SKA          | Oberkulmer Rotkorn | OBR          | W-05025/01*    | DU6 | Ramses           | RAM | Monlis      | MON |
| Tabasco             | TAB          | Samir              | SAM          | W-05026/03*    | DU7 | Roter Heidfelder | ROH | MV Menket   | MVM |
| Tobak               | TOB          | Schwabenkorn       | SCH          | W-05029/02*    | DU8 | Späth's Albjuwel | SPA | Terzino     | TER |
| Tommi               | TOM          | Zollernspelz       | ZOL          | Wintergold     | WIN | Teutonia         | TEU | Tifi        | TIF |

\* = cultivar from the State Plant Breeding Institute (University of Hohenheim)

**Table S2**

Gladin and glutenin fractions extracted by modified Osborne fractionation and quantitated both by reversed phase high-performance liquid chromatography (RP-HPLC) and by photometric Bradford assay. CV, coefficient of variation

|                     | Gladin content (mg/g) <sup>a</sup> |            | Glutenin content (mg/g) <sup>a</sup> |            |
|---------------------|------------------------------------|------------|--------------------------------------|------------|
|                     | RP-HPLC                            | Bradford   | RP-HPLC                              | Bradford   |
| <b>Common wheat</b> |                                    |            |                                      |            |
| Mulan               | 46.8 ± 1.4                         | 49.9 ± 1.5 | 20.5 ± 0.6                           | 19.1 ± 1.3 |
| Tommi               | 47.2 ± 0.3                         | 49.8 ± 1.6 | 23.8 ± 0.8                           | 17.7 ± 0.8 |
| Tabasco             | 42.5 ± 0.2                         | 45.2 ± 1.4 | 16.9 ± 0.0                           | 14.5 ± 0.6 |
| Event               | 61.0 ± 2.3                         | 54.5 ± 2.3 | 28.1 ± 0.4                           | 22.5 ± 1.8 |
| JB Asano            | 60.4 ± 0.1                         | 55.5 ± 0.6 | 19.2 ± 0.6                           | 18.3 ± 0.9 |
| Lear                | 39.1 ± 0.7                         | 39.3 ± 1.4 | 12.3 ± 0.3                           | 12.3 ± 0.8 |
| Genius              | 55.8 ± 0.8                         | 57.5 ± 1.4 | 25.0 ± 0.8                           | 22.9 ± 1.2 |
| Tobak               | 45.1 ± 0.5                         | 42.4 ± 1.5 | 15.8 ± 0.9                           | 15.9 ± 0.3 |
| CV (%)              | 1.5                                | 3.0        | 2.8                                  | 5.2        |
| <b>Spelt</b>        |                                    |            |                                      |            |
| Badenkrone          | 58.3 ± 0.3                         | 62.1 ± 1.6 | 14.6 ± 0.4                           | 16.4 ± 0.9 |
| Franckenkorn        | 63.6 ± 0.3                         | 64.1 ± 1.5 | 22.4 ± 0.3                           | 22.6 ± 1.1 |
| Zollernspelz        | 77.0 ± 0.8                         | 71.1 ± 3.4 | 22.1 ± 0.6                           | 21.6 ± 1.9 |
| Oberkulmer          | 91.0 ± 0.7                         | 86.3 ± 3.2 | 23.9 ± 2.2                           | 25.4 ± 0.8 |
| Badenstern          | 72.4 ± 0.9                         | 72.9 ± 1.1 | 18.3 ± 0.2                           | 17.6 ± 1.2 |
| Badengold           | 59.9 ± 0.9                         | 61.3 ± 2.4 | 18.3 ± 0.4                           | 18.7 ± 0.9 |
| Schwabenkorn        | 82.4 ± 1.9                         | 85.5 ± 2.8 | 24.5 ± 1.2                           | 24.5 ± 0.6 |
| Filderstolz         | 68.1 ± 0.3                         | 66.4 ± 3.2 | 24.2 ± 0.4                           | 23.2 ± 1.1 |
| CV (%)              | 1.6                                | 3.4        | 1.6                                  | 5.2        |
| <b>Durum wheat</b>  |                                    |            |                                      |            |
| Auradur             | 72.4 ± 0.8                         | 72.6 ± 0.4 | 17.5 ± 0.5                           | 13.5 ± 0.1 |
| Logidur             | 69.8 ± 1.4                         | 66.7 ± 2.2 | 23.8 ± 0.5                           | 24.1 ± 0.7 |
| Wintergold          | 69.7 ± 4.4                         | 73.5 ± 4.5 | 18.5 ± 0.3                           | 14.3 ± 0.5 |
| Lunadur             | 74.9 ± 1.1                         | 74.1 ± 1.8 | 25.2 ± 0.4                           | 23.1 ± 0.2 |
| Elsadur             | 71.1 ± 0.6                         | 73.2 ± 1.3 | 17.0 ± 0.7                           | 19.5 ± 0.4 |
| Karur               | 72.9 ± 0.2                         | 70.3 ± 3.6 | 20.7 ± 0.6                           | 21.9 ± 0.4 |
| Lupidur             | 64.5 ± 2.4                         | 62.4 ± 4.0 | 29.6 ± 0.0                           | 25.7 ± 2.0 |
| W-05005/02          | 64.1 ± 0.7                         | 60.1 ± 2.6 | 12.2 ± 0.6                           | 13.8 ± 0.7 |
| CV (%)              | 2.1                                | 3.7        | 2.5                                  | 3.0        |
| <b>Emmer</b>        |                                    |            |                                      |            |
| Osiris              | 63.4 ± 1.3                         | 63.4 ± 3.8 | 11.9 ± 0.3                           | 10.5 ± 0.8 |
| Ramses              | 56.2 ± 0.2                         | 59.1 ± 3.0 | 12.4 ± 0.2                           | 14.6 ± 1.7 |
| Heuholzer Kolben    | 63.5 ± 0.8                         | 67.2 ± 2.0 | 10.7 ± 0.2                           | 9.7 ± 0.4  |
| Teutonia            | 61.6 ± 0.4                         | 58.3 ± 2.1 | 9.2 ± 0.7                            | 10.1 ± 0.9 |
| CC1E-04058/01       | 57.3 ± 0.7                         | 60.0 ± 2.8 | 16.1 ± 0.2                           | 15.8 ± 0.6 |
| CC1E-04059/01       | 56.0 ± 0.1                         | 53.6 ± 1.6 | 10.2 ± 0.4                           | 11.4 ± 0.7 |
| Späths Albjuwel     | 57.1 ± 0.5                         | 54.3 ± 3.9 | 10.2 ± 0.3                           | 11.6 ± 1.6 |
| 9.105/06/01         | 51.9 ± 0.8                         | 52.6 ± 3.5 | 11.8 ± 0.4                           | 13.7 ± 1.1 |
| CV (%)              | 1.0                                | 4.9        | 3.1                                  | 8.0        |
| <b>Einkorn</b>      |                                    |            |                                      |            |
| Tifi                | 65.4 ± 1.8                         | 63.2 ± 3.4 | 7.9 ± 0.2                            | 7.5 ± 0.5  |
| Terzino             | 68.3 ± 1.2                         | 73.9 ± 2.3 | 7.2 ± 0.1                            | 8.7 ± 0.9  |
| Monlis              | 61.0 ± 2.0                         | 60.9 ± 3.4 | 14.4 ± 0.8                           | 16.4 ± 0.3 |
| M-04018/01          | 64.7 ± 1.5                         | 61.9 ± 2.5 | 6.1 ± 0.5                            | 8.1 ± 0.3  |
| 8.108/04            | 62.2 ± 0.8                         | 66.0 ± 1.0 | 7.9 ± 0.2                            | 11.2 ± 0.1 |
| M04033/03           | 66.2 ± 0.4                         | 69.5 ± 2.9 | 11.4 ± 0.6                           | 12.7 ± 0.4 |
| Mv Menket           | 76.9 ± 0.7                         | 69.2 ± 2.4 | 6.4 ± 0.3                            | 7.7 ± 0.4  |
| M07006/01           | 54.3 ± 0.6                         | 52.5 ± 2.4 | 10.1 ± 0.4                           | 11.9 ± 0.4 |
| CV (%)              | 1.8                                | 4.0        | 4.5                                  | 4.3        |

**Table S3**

Contents of gliadins, glutenins, gluten and protein, and ratio between gliadins and glutenins (GLIA/GLUT) determined by photometric Bradford assay of 15 cultivars per wheat species (common wheat, spelt, durum wheat, emmer and einkorn) cultivated at four different locations<sup>a</sup>

| Name <sup>b</sup>   | Gliadins (mg/g) |      |      |      | Glutenins (mg/g) |      |      |      | Gluten (mg/g) |      |      |      | Protein (%) |      |      |      | GLIA/GLUT <sup>c</sup> |     |     |     |
|---------------------|-----------------|------|------|------|------------------|------|------|------|---------------|------|------|------|-------------|------|------|------|------------------------|-----|-----|-----|
|                     | SEL             | OLI  | HOH  | EKW  | SEL              | OLI  | HOH  | EKW  | SEL           | OLI  | HOH  | EKW  | SEL         | OLI  | HOH  | EKW  | SEL                    | OLI | HOH | EKW |
| <i>Common wheat</i> |                 |      |      |      |                  |      |      |      |               |      |      |      |             |      |      |      |                        |     |     |     |
| MUL                 | 49.1            | 32.1 | 46.2 | 42.0 | 19.1             | 11.9 | 15.7 | 19.5 | 68.2          | 44.0 | 61.9 | 61.5 | 10.9        | 7.7  | 9.6  | 10.0 | 2.6                    | 2.7 | 2.9 | 2.2 |
| TOM                 | 49.8            | 34.9 | 44.9 | 44.9 | 17.7             | 15.0 | 17.0 | 20.0 | 67.4          | 49.9 | 61.9 | 65.0 | 10.9        | 8.1  | 9.8  | 10.7 | 2.8                    | 2.3 | 2.6 | 2.2 |
| TAB                 | 45.2            | 37.2 | 43.3 | 37.6 | 14.5             | 12.8 | 15.7 | 17.1 | 59.6          | 50.0 | 59.0 | 54.7 | 10.0        | 8.4  | 9.2  | 9.5  | 3.1                    | 2.9 | 2.8 | 2.2 |
| EVE                 | 54.5            | 35.7 | 52.4 | 46.9 | 22.5             | 16.6 | 21.9 | 25.0 | 77.1          | 52.2 | 74.3 | 71.9 | 13.3        | 8.4  | 11.6 | 11.8 | 2.4                    | 2.2 | 2.4 | 1.9 |
| SKA                 | 43.6            | 32.3 | 41.5 | 38.3 | 16.6             | 11.9 | 13.1 | 16.3 | 60.2          | 44.3 | 54.6 | 54.5 | 10.4        | 7.7  | 8.7  | 9.8  | 2.6                    | 2.7 | 3.2 | 2.4 |
| ALT                 | 42.3            | 28.1 | 45.4 | 42.8 | 19.5             | 13.4 | 13.6 | 17.7 | 61.9          | 41.4 | 59.1 | 60.5 | 11.2        | 7.6  | 9.4  | 10.2 | 2.2                    | 2.1 | 3.3 | 2.4 |
| JBA                 | 55.5            | 37.8 | 47.4 | 43.8 | 18.3             | 11.2 | 16.4 | 17.3 | 73.8          | 49.0 | 63.8 | 61.2 | 11.5        | 7.5  | 9.2  | 9.9  | 3.0                    | 3.4 | 2.9 | 2.5 |
| JUL                 | 43.1            | 25.8 | 46.2 | 38.0 | 18.4             | 13.4 | 16.3 | 17.5 | 61.5          | 39.2 | 62.5 | 55.6 | 10.9        | 7.5  | 8.8  | 9.3  | 2.3                    | 1.9 | 2.8 | 2.2 |
| LEA                 | 39.2            | 22.2 | 36.7 | 39.1 | 12.3             | 11.0 | 11.4 | 15.4 | 51.6          | 33.2 | 48.1 | 54.4 | 9.3         | 7.2  | 8.3  | 9.0  | 3.2                    | 2.0 | 3.2 | 2.5 |
| CUB                 | 45.8            | 27.8 | 46.4 | 42.0 | 17.3             | 14.3 | 17.3 | 21.4 | 63.1          | 42.1 | 63.7 | 63.4 | 11.0        | 7.6  | 9.5  | 11.3 | 2.6                    | 1.9 | 2.7 | 2.0 |
| MEI                 | 47.9            | 29.2 | 50.6 | 41.6 | 14.7             | 10.9 | 13.5 | 17.4 | 62.5          | 40.1 | 64.1 | 59.0 | 10.7        | 7.6  | 9.6  | 10.3 | 3.3                    | 2.7 | 3.8 | 2.4 |
| ORC                 | 43.8            | 28.7 | 43.9 | 36.1 | 18.3             | 13.3 | 18.5 | 19.7 | 62.0          | 42.1 | 62.4 | 55.8 | 10.9        | 7.5  | 9.4  | 9.9  | 2.4                    | 2.2 | 2.4 | 1.8 |
| COL                 | 44.4            | 26.4 | 45.8 | 36.2 | 18.9             | 15.1 | 19.9 | 22.7 | 63.3          | 41.5 | 65.7 | 58.9 | 11.2        | 7.6  | 10.0 | 10.4 | 2.3                    | 1.8 | 2.3 | 1.6 |
| GEN                 | 57.5            | 32.5 | 49.8 | 42.0 | 22.9             | 16.2 | 20.2 | 21.0 | 80.4          | 48.7 | 70.0 | 63.0 | 12.1        | 8.1  | 10.6 | 11.0 | 2.5                    | 2.0 | 2.5 | 2.0 |
| TOB                 | 49.1            | 33.4 | 46.9 | 44.8 | 15.9             | 12.7 | 14.7 | 15.6 | 58.2          | 46.1 | 61.6 | 60.4 | 10.1        | 7.8  | 9.1  | 10.3 | 2.7                    | 2.6 | 3.2 | 2.9 |
| Mean <sup>d</sup>   | 46.9            | 30.9 | 45.8 | 41.1 | 17.8             | 13.3 | 16.3 | 18.9 | 64.7          | 44.3 | 62.2 | 60.0 | 11.0        | 7.7  | 9.5  | 10.2 | 2.7                    | 2.4 | 2.9 | 2.2 |
| CV (%) <sup>e</sup> | 3.8             | 6.0  | 3.0  | 7.1  | 4.7              | 6.4  | 4.8  | 3.8  | -             | -    | -    | -    | 0.7         | 1.1  | 0.7  | 0.9  | -                      | -   | -   | -   |
| <i>Spelt</i>        |                 |      |      |      |                  |      |      |      |               |      |      |      |             |      |      |      |                        |     |     |     |
| BAG                 | 61.3            | 57.5 | 49.2 | 54.6 | 18.7             | 12.5 | 17.5 | 18.7 | 80.0          | 70.0 | 66.7 | 73.3 | 11.0        | 9.6  | 9.6  | 10.5 | 3.3                    | 4.6 | 2.8 | 2.9 |
| BAK                 | 62.1            | 47.3 | 55.6 | 61.4 | 16.4             | 14.3 | 15.3 | 16.7 | 78.4          | 61.6 | 70.9 | 78.2 | 10.8        | 9.4  | 10.1 | 10.6 | 3.8                    | 3.3 | 3.6 | 3.7 |
| BAS                 | 72.8            | 47.2 | 58.2 | 64.5 | 17.6             | 14.1 | 16.3 | 19.4 | 90.4          | 61.3 | 74.6 | 83.9 | 12.6        | 9.4  | 10.8 | 11.7 | 4.1                    | 3.3 | 3.6 | 3.3 |
| DI1                 | 61.9            | 45.9 | 52.2 | 64.1 | 17.0             | 15.7 | 13.2 | 22.9 | 78.9          | 61.6 | 65.4 | 87.0 | 11.1        | 9.4  | 9.3  | 11.3 | 3.6                    | 2.9 | 4.0 | 2.8 |
| DI2                 | 71.4            | 50.0 | 59.2 | 60.2 | 20.8             | 17.1 | 19.3 | 24.7 | 92.1          | 67.0 | 78.5 | 84.9 | 12.5        | 10.1 | 10.2 | 11.0 | 3.4                    | 2.9 | 3.1 | 2.4 |
| DI3                 | 66.7            | 57.0 | 57.3 | 57.9 | 21.1             | 17.6 | 18.8 | 21.8 | 87.7          | 74.6 | 76.1 | 79.7 | 11.9        | 10.4 | 10.2 | 10.3 | 3.2                    | 3.2 | 3.0 | 2.7 |

| Name <sup>b</sup>   | Gliadins (mg/g) |      |      |      | Glutenins (mg/g) |      |      |      | Gluten (mg/g) |      |      |       | Protein (%) |      |      |      | GLIA/GLUT <sup>c</sup> |     |     |     |
|---------------------|-----------------|------|------|------|------------------|------|------|------|---------------|------|------|-------|-------------|------|------|------|------------------------|-----|-----|-----|
|                     | SEL             | OLI  | HOH  | EKW  | SEL              | OLI  | HOH  | EKW  | SEL           | OLI  | HOH  | EKW   | SEL         | OLI  | HOH  | EKW  | SEL                    | OLI | HOH | EKW |
| DI4                 | 58.9            | 50.9 | 50.6 | 57.6 | 19.8             | 19.3 | 20.0 | 25.3 | 78.7          | 70.2 | 70.6 | 82.9  | 11.2        | 9.6  | 9.4  | 10.5 | 3.0                    | 2.6 | 2.5 | 2.3 |
| DI5                 | 61.2            | 53.4 | 56.8 | 61.8 | 18.1             | 18.0 | 19.2 | 24.8 | 79.3          | 71.5 | 76.0 | 86.6  | 12.3        | 9.7  | 10.0 | 11.1 | 3.4                    | 3.0 | 3.0 | 2.5 |
| DIV                 | 82.9            | 54.7 | 66.6 | 73.2 | 20.1             | 17.6 | 14.2 | 22.8 | 103.0         | 72.3 | 80.8 | 96.0  | 13.6        | 10.8 | 11.3 | 13.3 | 4.1                    | 3.1 | 4.7 | 3.2 |
| FIL                 | 66.4            | 47.5 | 53.7 | 60.6 | 23.2             | 17.4 | 20.4 | 25.1 | 89.6          | 65.0 | 74.1 | 85.7  | 13.0        | 10.3 | 10.6 | 12.1 | 2.9                    | 2.7 | 2.6 | 2.4 |
| FRA                 | 64.0            | 50.5 | 55.6 | 62.5 | 22.6             | 19.1 | 19.3 | 20.2 | 86.6          | 69.5 | 74.8 | 82.7  | 12.8        | 10.5 | 10.8 | 11.9 | 2.8                    | 2.6 | 2.9 | 3.1 |
| OBR                 | 86.3            | 62.0 | 67.5 | 78.3 | 25.4             | 17.1 | 17.7 | 22.3 | 111.6         | 79.1 | 85.2 | 100.6 | 16.1        | 11.3 | 12.8 | 15.1 | 3.4                    | 3.6 | 3.8 | 3.5 |
| SAM                 | 63.0            | 46.2 | 52.2 | 54.6 | 18.2             | 9.6  | 15.8 | 21.0 | 81.2          | 55.7 | 68.1 | 75.6  | 12.5        | 9.1  | 10.6 | 10.7 | 3.5                    | 4.8 | 3.3 | 2.6 |
| SCH                 | 85.5            | 63.9 | 64.8 | 81.7 | 24.5             | 17.4 | 18.8 | 22.4 | 110.0         | 81.3 | 83.6 | 104.1 | 14.4        | 11.4 | 12.3 | 14.3 | 3.5                    | 3.7 | 3.4 | 3.6 |
| ZOL                 | 71.1            | 65.8 | 61.9 | 65.7 | 21.5             | 15.3 | 15.7 | 20.9 | 92.7          | 81.0 | 77.7 | 86.6  | 13.0        | 11.4 | 11.4 | 12.4 | 3.3                    | 4.3 | 3.9 | 3.1 |
| Mean <sup>d</sup>   | 69.0            | 53.3 | 57.4 | 63.9 | 20.3             | 16.1 | 17.4 | 21.9 | 89.3          | 69.5 | 74.9 | 85.8  | 12.6        | 10.2 | 10.6 | 11.8 | 3.4                    | 3.4 | 3.4 | 2.9 |
| CV (%) <sup>e</sup> | 3.1             | 4.5  | 4.6  | 3.1  | 4.6              | 6.0  | 4.9  | 4.2  | -             | -    | -    | -     | 0.7         | 1.0  | 0.9  | 0.6  | -                      | -   | -   | -   |
| <i>Durum wheat</i>  |                 |      |      |      |                  |      |      |      |               |      |      |       |             |      |      |      |                        |     |     |     |
| AUR                 | 72.6            | 42.1 | 59.2 | 59.7 | 13.5             | 12.8 | 16.5 | 14.1 | 86.0          | 55.0 | 75.8 | 73.8  | 13.7        | 9.0  | 12.1 | 11.9 | 5.4                    | 3.3 | 3.6 | 4.2 |
| DU1                 | 60.1            | 71.8 | 51.4 | 56.9 | 13.8             | 15.4 | 11.8 | 14.0 | 73.9          | 87.2 | 63.2 | 70.9  | 14.0        | 8.2  | 11.3 | 10.4 | 4.3                    | 4.7 | 4.4 | 4.1 |
| DU2                 | 82.8            | 74.2 | 60.0 | 58.6 | 12.0             | 9.9  | 10.4 | 9.4  | 94.8          | 84.1 | 70.4 | 68.0  | 13.6        | 8.6  | 13.1 | 10.7 | 6.9                    | 7.5 | 5.8 | 6.3 |
| DU3                 | 84.7            | 67.4 | 65.4 | 57.9 | 18.8             | 15.7 | 16.1 | 11.5 | 103.5         | 83.1 | 81.4 | 69.3  | 14.6        | 10.4 | 12.4 | 11.9 | 4.5                    | 4.3 | 4.1 | 5.0 |
| DU4                 | 87.0            | 62.6 | 80.0 | 67.8 | 17.1             | 13.6 | 18.5 | 15.6 | 104.0         | 76.1 | 98.5 | 83.4  | 15.1        | 9.5  | 12.1 | 11.9 | 5.1                    | 4.6 | 4.3 | 4.3 |
| DU5                 | 64.5            | 55.1 | 50.1 | 43.7 | 12.6             | 15.5 | 12.3 | 12.7 | 77.1          | 70.6 | 62.3 | 56.4  | 14.0        | 10.1 | 11.3 | 10.8 | 5.1                    | 3.5 | 4.1 | 3.4 |
| DU6                 | 84.5            | 63.5 | 62.8 | 54.9 | 18.0             | 15.4 | 15.2 | 13.5 | 102.5         | 78.9 | 78.1 | 68.4  | 15.5        | 9.3  | 11.0 | 12.7 | 4.7                    | 4.1 | 4.1 | 4.1 |
| DU7                 | 84.7            | 56.7 | 63.8 | 69.2 | 22.8             | 15.5 | 14.5 | 15.4 | 107.5         | 72.1 | 78.3 | 84.5  | 13.0        | 12.8 | 10.9 | 12.1 | 3.7                    | 3.7 | 4.4 | 4.5 |
| DU8                 | 83.9            | 69.9 | 60.5 | 55.2 | 20.3             | 19.7 | 14.4 | 16.5 | 104.2         | 89.6 | 74.9 | 71.6  | 12.9        | 12.2 | 11.8 | 10.8 | 4.1                    | 3.5 | 4.2 | 3.3 |
| ELS                 | 73.2            | 41.3 | 56.3 | 55.5 | 19.5             | 15.2 | 12.5 | 12.8 | 92.7          | 56.5 | 68.8 | 68.3  | 14.7        | 12.3 | 12.9 | 11.4 | 3.8                    | 2.7 | 4.5 | 4.3 |
| KAR                 | 70.3            | 51.7 | 53.2 | 53.2 | 21.9             | 15.3 | 16.9 | 15.6 | 92.2          | 67.0 | 70.0 | 68.8  | 15.0        | 11.1 | 15.5 | 14.0 | 3.2                    | 3.4 | 3.1 | 3.4 |
| LOG                 | 66.7            | 32.3 | 53.7 | 42.9 | 24.1             | 15.1 | 17.7 | 17.1 | 90.9          | 47.4 | 71.4 | 60.0  | 11.1        | 12.8 | 10.8 | 9.9  | 2.8                    | 2.1 | 3.0 | 2.5 |
| LUN                 | 74.1            | 55.5 | 53.5 | 55.5 | 23.1             | 17.3 | 19.4 | 18.0 | 97.2          | 72.8 | 72.9 | 73.6  | 14.1        | 12.0 | 12.5 | 10.9 | 3.2                    | 3.2 | 2.8 | 3.1 |
| LUP                 | 62.4            | 44.1 | 44.5 | 52.2 | 25.7             | 20.0 | 20.8 | 24.0 | 88.1          | 64.1 | 65.3 | 76.2  | 14.7        | 10.8 | 12.0 | 11.6 | 2.4                    | 2.2 | 2.1 | 2.2 |
| WIN                 | 73.5            | 47.1 | 60.1 | 54.2 | 14.3             | 12.2 | 15.6 | 11.6 | 87.8          | 59.3 | 75.7 | 65.8  | 13.8        | 13.1 | 11.4 | 11.0 | 5.1                    | 3.9 | 3.8 | 4.7 |
| Mean <sup>d</sup>   | 75.0            | 55.7 | 58.3 | 55.8 | 18.5             | 15.2 | 15.5 | 14.8 | 93.5          | 70.9 | 73.8 | 70.6  | 14.0        | 10.8 | 12.1 | 11.5 | 4.3                    | 3.8 | 3.9 | 4.0 |
| CV (%) <sup>e</sup> | 3.8             | 4.7  | 3.6  | 4.3  | 3.8              | 4.7  | 5.1  | 5.8  | -             | -    | -    | -     | 0.7         | 0.9  | 0.7  | 0.7  | -                      | -   | -   | -   |

| Name <sup>b</sup>   | Gliadins (mg/g) |      |      |      | Glutenins (mg/g) |      |      |      | Gluten (mg/g) |       |      |      | Protein (%) |      |      |      | GLIA/GLUT <sup>c</sup> |     |      |     |
|---------------------|-----------------|------|------|------|------------------|------|------|------|---------------|-------|------|------|-------------|------|------|------|------------------------|-----|------|-----|
|                     | SEL             | OLI  | HOH  | EKW  | SEL              | OLI  | HOH  | EKW  | SEL           | OLI   | HOH  | EKW  | SEL         | OLI  | HOH  | EKW  | SEL                    | OLI | HOH  | EKW |
| <i>Emmer</i>        |                 |      |      |      |                  |      |      |      |               |       |      |      |             |      |      |      |                        |     |      |     |
| HEU                 | 67.2            | 70.2 | 51.4 | 52.8 | 9.7              | 11.5 | 10.2 | 11.0 | 76.9          | 81.7  | 61.6 | 63.9 | 11.6        | 12.0 | 8.9  | 9.6  | 6.9                    | 6.1 | 5.1  | 4.8 |
| EM1                 | 60.0            | 76.9 | 67.3 | 59.1 | 15.8             | 20.6 | 15.4 | 15.3 | 75.8          | 97.5  | 82.7 | 74.4 | 12.4        | 13.6 | 10.7 | 10.9 | 3.8                    | 3.7 | 4.4  | 3.9 |
| EM2                 | 53.6            | 70.0 | 54.5 | 55.2 | 11.4             | 11.7 | 8.8  | 12.4 | 65.0          | 81.7  | 63.3 | 67.6 | 11.2        | 12.1 | 9.2  | 9.5  | 4.7                    | 6.0 | 6.2  | 4.4 |
| EM3                 | 56.0            | 74.4 | 59.5 | 52.0 | 13.6             | 12.4 | 11.4 | 14.0 | 69.6          | 86.8  | 70.9 | 66.0 | 11.8        | 13.2 | 10.5 | 10.0 | 4.1                    | 6.0 | 5.2  | 3.7 |
| EM4                 | 60.5            | 66.1 | 53.7 | 44.1 | 13.7             | 11.6 | 11.4 | 10.5 | 74.2          | 77.7  | 65.1 | 54.6 | 11.7        | 12.0 | 9.6  | 9.3  | 4.4                    | 5.7 | 4.7  | 4.2 |
| EM5                 | 52.6            | 73.6 | 48.0 | 54.0 | 11.6             | 9.7  | 11.3 | 14.6 | 64.2          | 83.3  | 59.3 | 68.6 | 9.8         | 11.7 | 8.8  | 10.0 | 4.5                    | 7.6 | 4.3  | 3.7 |
| EM6                 | 54.3            | 67.7 | 48.4 | 51.9 | 11.6             | 11.1 | 8.5  | 13.6 | 65.9          | 78.8  | 56.9 | 65.5 | 11.9        | 13.2 | 9.4  | 10.2 | 4.7                    | 6.1 | 5.7  | 3.8 |
| EM7                 | 52.6            | 76.8 | 53.2 | 49.4 | 13.7             | 16.1 | 11.1 | 12.5 | 66.3          | 92.9  | 64.2 | 61.9 | 11.3        | 14.3 | 9.9  | 9.7  | 3.8                    | 4.8 | 4.8  | 4.0 |
| EM8                 | 72.6            | 84.3 | 67.5 | 61.9 | 18.5             | 22.7 | 18.6 | 17.7 | 91.1          | 107.0 | 86.0 | 79.6 | 12.5        | 16.2 | 11.8 | 12.4 | 3.9                    | 3.7 | 3.6  | 3.5 |
| EM9                 | 56.5            | 64.1 | 47.7 | 46.0 | 14.7             | 16.2 | 11.8 | 13.5 | 71.2          | 80.4  | 59.5 | 59.5 | 11.4        | 12.8 | 9.5  | 9.5  | 3.8                    | 3.9 | 4.0  | 3.4 |
| OSI                 | 63.4            | 74.0 | 46.0 | 59.6 | 10.4             | 11.4 | 15.1 | 12.5 | 73.8          | 85.4  | 61.1 | 72.1 | 12.4        | 13.2 | 9.9  | 10.6 | 6.1                    | 6.5 | 3.0  | 4.8 |
| RAM                 | 59.1            | 70.0 | 54.5 | 51.0 | 14.6             | 18.4 | 13.5 | 13.1 | 73.6          | 88.4  | 68.0 | 64.1 | 11.6        | 13.4 | 9.7  | 10.1 | 4.0                    | 3.8 | 4.1  | 3.9 |
| ROH                 | 60.2            | 61.8 | 42.2 | 47.0 | 10.9             | 11.5 | 9.3  | 15.0 | 71.2          | 73.3  | 51.5 | 62.0 | 10.7        | 11.5 | 8.5  | 9.3  | 5.5                    | 5.4 | 4.6  | 3.1 |
| SPA                 | 63.1            | 75.5 | 64.5 | 61.7 | 12.8             | 13.8 | 5.8  | 9.1  | 75.9          | 89.3  | 70.3 | 70.8 | 12.5        | 11.4 | 10.2 | 10.1 | 4.9                    | 5.5 | 11.1 | 6.7 |
| TEU                 | 58.3            | 81.9 | 55.0 | 56.9 | 10.1             | 12.6 | 7.4  | 10.1 | 68.4          | 94.5  | 62.4 | 67.0 | 11.3        | 14.2 | 8.9  | 9.4  | 5.8                    | 6.5 | 7.4  | 5.6 |
| Mean <sup>d</sup>   | 59.3            | 72.5 | 54.2 | 53.5 | 12.9             | 14.1 | 11.3 | 12.5 | 72.2          | 86.6  | 65.5 | 66.5 | 11.6        | 13.0 | 9.7  | 10.0 | 4.7                    | 5.4 | 5.2  | 4.2 |
| CV (%) <sup>e</sup> | 3.8             | 3.2  | 3.5  | 3.4  | 7.3              | 6.9  | 5.9  | 4.9  | -             | -     | -    | -    | 0.9         | 0.8  | 1.0  | 0.8  | -                      | -   | -    | -   |
| <i>Einkorn</i>      |                 |      |      |      |                  |      |      |      |               |       |      |      |             |      |      |      |                        |     |      |     |
| TIF                 | 63.2            | 62.2 | 54.7 | 54.6 | 7.5              | 7.3  | 9.3  | 8.5  | 70.7          | 69.5  | 64.0 | 63.1 | 11.6        | 13.1 | 9.5  | 9.8  | 8.5                    | 8.5 | 5.9  | 6.4 |
| TER                 | 73.8            | 70.4 | 68.5 | 64.3 | 8.7              | 10.1 | 7.8  | 11.9 | 82.5          | 80.5  | 76.3 | 76.3 | 13.1        | 14.4 | 10.9 | 10.5 | 8.5                    | 6.9 | 8.8  | 5.4 |
| MON                 | 60.9            | -    | 59.1 | 63.9 | 16.4             | -    | 13.5 | 16.8 | 77.2          | -     | 72.6 | 80.7 | 13.1        | -    | 10.3 | 10.9 | 3.7                    | -   | 4.4  | 3.8 |
| K01                 | 61.9            | 61.6 | 63.6 | 65.9 | 8.1              | 9.1  | 7.3  | 7.6  | 69.9          | 70.7  | 70.9 | 73.5 | 12.6        | 12.1 | 10.0 | 9.7  | 7.7                    | 6.7 | 8.7  | 8.6 |
| K02                 | 65.9            | 65.7 | 58.4 | 53.7 | 11.2             | 12.8 | 8.0  | 12.4 | 77.2          | 78.5  | 66.3 | 66.1 | 12.3        | 13.6 | 9.8  | 9.8  | 5.9                    | 5.1 | 7.3  | 4.3 |
| K03                 | 69.5            | 72.3 | 69.1 | 67.6 | 12.7             | 13.6 | 13.2 | 13.5 | 82.1          | 85.9  | 82.3 | 81.1 | 13.2        | 14.2 | 10.6 | 10.5 | 5.5                    | 5.3 | 5.3  | 5.0 |
| MVM                 | 69.2            | -    | 78.0 | 74.8 | 7.7              | -    | 7.6  | 8.1  | 76.9          | -     | 85.7 | 82.9 | 13.9        | -    | 12.0 | 11.8 | 9.0                    | -   | 10.2 | 9.3 |
| K04                 | 52.5            | 61.7 | 60.5 | 62.5 | 11.9             | 11.6 | 7.9  | 10.9 | 64.4          | 73.3  | 68.5 | 73.5 | 11.6        | 12.4 | 10.1 | 9.4  | 4.4                    | 5.3 | 7.7  | 5.7 |
| K05                 | 69.0            | 74.0 | 62.4 | 61.0 | 11.5             | 12.5 | 7.8  | 11.3 | 80.5          | 86.6  | 70.2 | 72.3 | 12.9        | 13.7 | 11.1 | 10.4 | 6.0                    | 5.9 | 8.0  | 5.4 |
| K06                 | 63.9            | 70.4 | 50.5 | 54.5 | 11.9             | 11.6 | 5.9  | 11.6 | 75.7          | 82.0  | 56.4 | 66.1 | 11.8        | 13.1 | 9.9  | 9.8  | 5.4                    | 6.1 | 8.6  | 4.7 |

| Name <sup>b</sup>   | Gliadins (mg/g) |      |      |      | Glutenins (mg/g) |      |      |      | Gluten (mg/g) |      |      |      | Protein (%) |      |      |      | GLIA/GLUT <sup>c</sup> |      |     |     |
|---------------------|-----------------|------|------|------|------------------|------|------|------|---------------|------|------|------|-------------|------|------|------|------------------------|------|-----|-----|
|                     | SEL             | OLI  | HOH  | EKW  | SEL              | OLI  | HOH  | EKW  | SEL           | OLI  | HOH  | EKW  | SEL         | OLI  | HOH  | EKW  | SEL                    | OLI  | HOH | EKW |
| K07                 | 70.1            | 66.3 | 55.0 | 58.5 | 7.4              | 7.8  | 7.1  | 10.8 | 77.6          | 74.2 | 62.1 | 69.3 | 12.1        | 13.1 | 10.5 | 10.1 | 9.4                    | 8.5  | 7.8 | 5.4 |
| K08                 | 65.9            | 68.3 | 51.7 | 57.3 | 12.6             | 5.6  | 5.4  | 7.5  | 78.6          | 73.9 | 57.1 | 64.9 | 12.3        | 12.8 | 10.3 | 10.1 | 5.2                    | 12.1 | 9.6 | 7.6 |
| K09                 | 64.3            | 72.0 | 57.3 | 62.1 | 8.5              | 12.8 | 12.0 | 13.0 | 72.9          | 84.8 | 69.4 | 75.0 | 12.8        | 13.7 | 10.6 | 10.2 | 7.6                    | 5.6  | 4.8 | 4.8 |
| K10                 | 52.7            | -    | 57.3 | 56.9 | 11.6             | -    | 10.2 | 10.4 | 64.3          | -    | 67.5 | 67.3 | 11.6        | -    | 10.1 | 9.6  | 4.5                    | -    | 5.6 | 5.5 |
| K11                 | 57.9            | 70.1 | 54.6 | 55.6 | 9.4              | 11.9 | 13.2 | 11.7 | 67.3          | 82.0 | 67.8 | 67.3 | 11.4        | 13.4 | 9.9  | 9.8  | 6.2                    | 5.9  | 4.1 | 4.8 |
| Mean <sup>d</sup>   | 64.1            | 67.9 | 60.1 | 60.9 | 10.5             | 10.6 | 9.1  | 11.1 | 74.5          | 78.5 | 69.1 | 72.0 | 12.4        | 13.3 | 10.4 | 10.1 | 6.5                    | 6.8  | 7.1 | 5.8 |
| CV (%) <sup>e</sup> | 4.3             | 2.6  | 4.9  | 3.9  | 5.0              | 3.7  | 5.7  | 5.9  | -             | -    | -    | -    | 0.9         | 0.6  | 0.7  | 0.8  | -                      | -    | -   | -   |

<sup>a</sup> Mean value (triplicate determinations)

<sup>b</sup> For abbreviations of cultivars see Table S1

<sup>c</sup> GLIA/GLUT, ratio between gliadins and glutenins

<sup>d</sup> mean value of each analytical parameter within one wheat species grown at one location

<sup>e</sup> Coefficient of variation across 15 cultivars of each wheat species grown at one location

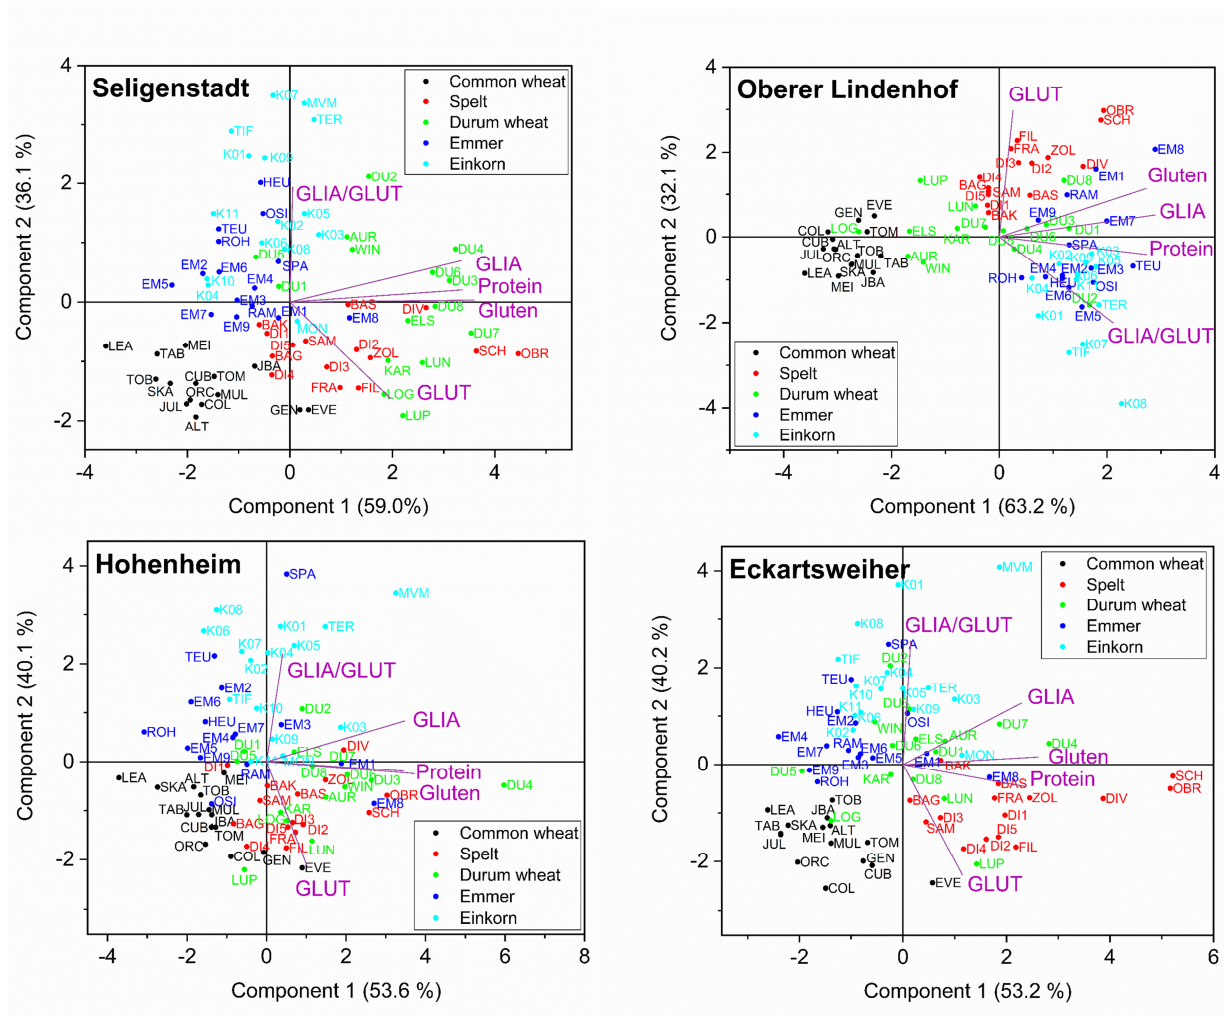

**Figure S1.** Biplot of principle component analysis (PCA) of gliadins (GLIA), glutenins (GLUT), gluten, protein content and ratio between GLIA and GLUT (GLIA/GLUT) of the five wheat species common wheat, spelt, durum wheat, emmer and einkorn for the four locations Seligenstadt, Oberer Lindenhof, Hohenheim and Eckartsweiher.



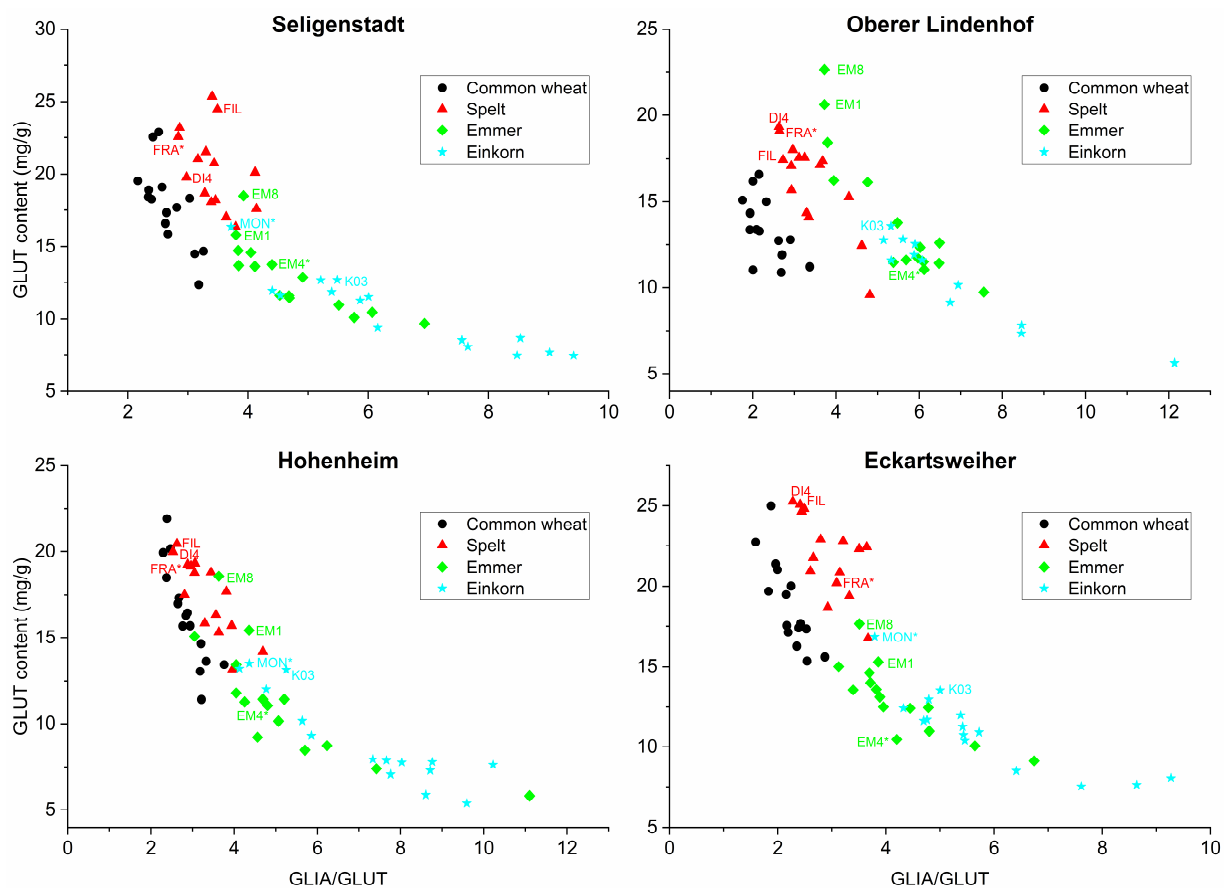

**Figure S2.** Scatterplot of glutenin content (GLUT) versus ratio of gliadins and glutenins (GLIA/GLUT) of common wheat, spelt, emmer and einkorn for the four locations Seligenstadt, Oberer Lindenhof, Hohenheim and Eckartsweiher for the identification of cultivars with predicted good baking performance.
